# Supplementary material for: Epigenetic state determines the in vivo efficacy of STING agonist therapy
Source: PubMed Central journal article supplement (PMC10033671; doi:10.1038/s41467-023-37217-1), 2023-03-22
Supplement: 41467_2023_37217_MOESM1_ESM.pdf [file 41467_2023_37217_MOESM1_ESM.pdf]

# Epigenetic state determines the *in vivo* efficacy of STING agonist therapy

Rana Falahat<sup>1</sup>, Anders Berglund<sup>2</sup>, Patricio Perez-Villarroel<sup>1</sup>, Ryan M. Putney<sup>2</sup>, Imene Hamaidi<sup>1</sup>, Sungjune Kim<sup>1,3</sup>, Shari Pilon-Thomas<sup>1,4</sup>, Glen N. Barber<sup>5</sup>, and James J. Mulé<sup>1,3,4\*</sup>

<sup>1</sup>Department of Immunology, Moffitt Cancer Center; Tampa, FL 33612

<sup>2</sup>Department of Biostatistics and Bioinformatics, Moffitt Cancer Center; Tampa, FL 33612

<sup>3</sup>Radiation Oncology Program, Moffitt Cancer Center; Tampa, FL 33612

<sup>4</sup>Cutaneous Oncology Program, Moffitt Cancer Center; Tampa, FL 33612

<sup>5</sup>Department of Cell Biology, University of Miami Miller School of Medicine; Miami, FL 33136

\*Corresponding Author: James J. Mulé, Moffitt Cancer Center, 12902 Magnolia Drive, Tampa, FL 33612. Phone: 813-745-1536; Fax: 813-745-6188; E-mail: James.Mule@moffitt.org

# Supplementary Figure 1

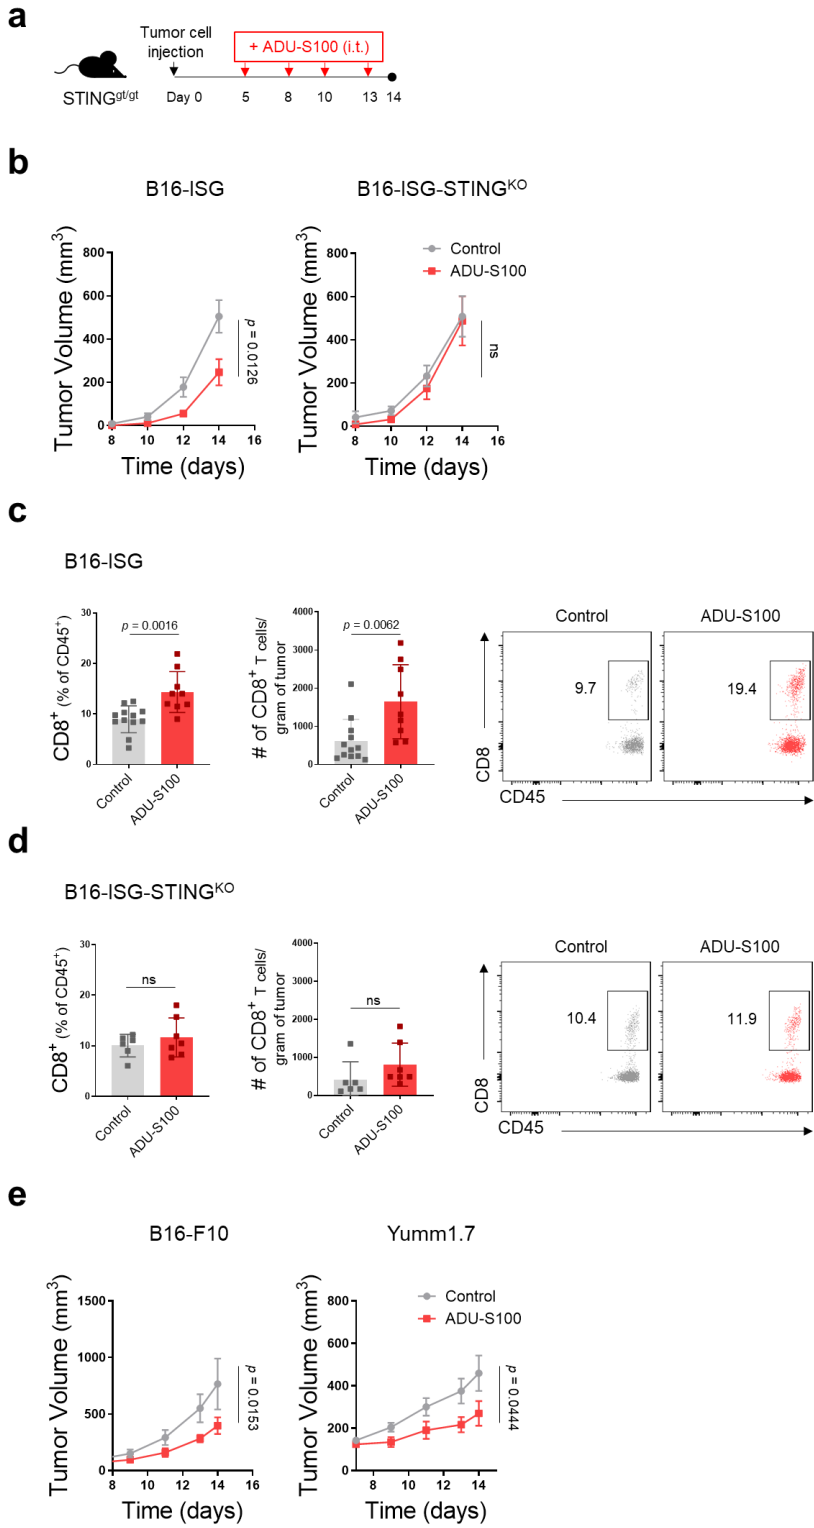

**Supplementary Figure 1. Melanoma-intrinsic STING activation results in delayed tumor growth and increased tumor-infiltrating CD8<sup>+</sup> T cells in the low tumor burden state.**

Schematic of the STING agonist treatment schedule. Groups of STING<sup>gt/gt</sup> mice were injected subcutaneously with  $1 \times 10^5$  B16-ISG or B16-ISG-STING<sup>KO</sup> or  $1.5 \times 10^5$  B16-F10 or Yumm1.7 on day 0. After tumor injection, tumor-bearing mice were intratumorally treated with either PBS or ADU-S100 (50  $\mu$ g) on days 5, 8, 10, and 13 **(a)**. Average tumor volume of B16-ISG and B16-ISG-STING<sup>KO</sup>-bearing STING<sup>gt/gt</sup> mice treated with PBS control or ADU-S100 as indicated in (a). Data are shown as mean  $\pm$  SEM. Data are representative of three independent experiments, B16-ISG (n = 11 and 14 mice for Control and ADU-S100 groups, respectively), B16-ISG-STING<sup>KO</sup> (n = 5 and 6 mice for Control and ADU-S100 groups, respectively) **(b)**. Frequency (left), total number (middle), and representative flow cytometry plots (right) of CD8<sup>+</sup> cells within the CD45<sup>+</sup> population in B16-ISG (n = 12 and 9 mice for Control and ADU-S100 groups, respectively) and B16-ISG-STING<sup>KO</sup> (n = 6 and 7 mice for Control and ADU-S100 groups, respectively) tumors treated with PBS control or ADU-S100. Data are shown as mean  $\pm$  SD **(c-d)**. B16-F10 and Yumm1.7 tumor growth in STING<sup>gt/gt</sup> mice treated with PBS control or ADU-S100 as indicated in (a). Data are shown as mean  $\pm$  SEM. Data are representative of two independent experiments, B16-F10 (n = 7 mice per group), Yumm1.7 (n = 6 mice per group) **(e)**. Statistical significance was determined by Unpaired Student's t-test (b-e) (ns, not significant).

## Supplementary Figure 2

**a**

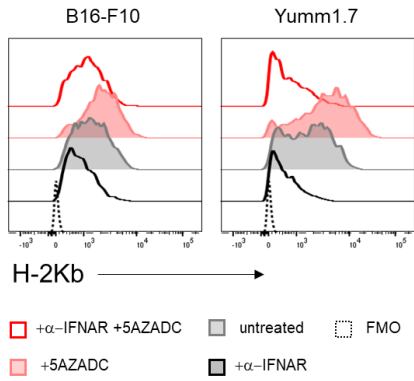

**c**

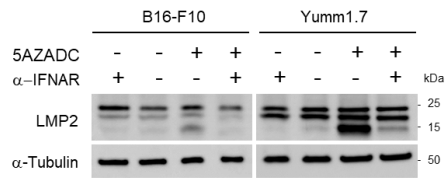

**b**

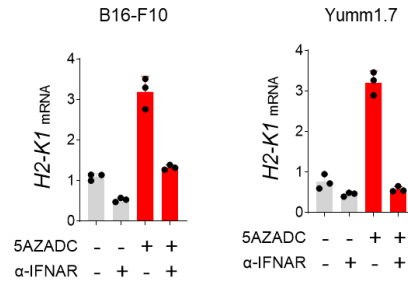

**d**

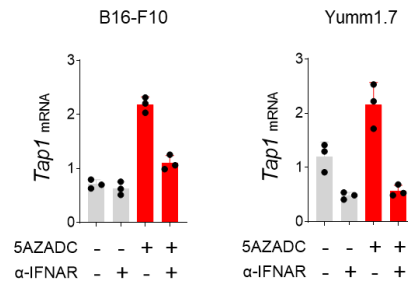

**Supplementary Figure 2. 5AZADC-induced upregulation of MHC I depends on type I IFN signaling.**

B16-F10 and Yumm1.7 cells were treated with 5AZADC in the presence or absence of an IFNAR blocking antibody. Representative histograms of MHC I (H2-Kb) expression **(a)**, quantitative RT-PCR analysis of *H2-k1* mRNA expression **(b)**, immunoblot analysis of LMP2 **(c)**, and *Tap1* mRNA expression **(d)** on indicated cells. Data are shown as mean  $\pm$  SD of three biological replicates and are representative of two independent experiments.

### Supplementary Figure 3

**a**

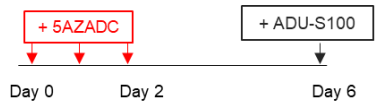

**b**

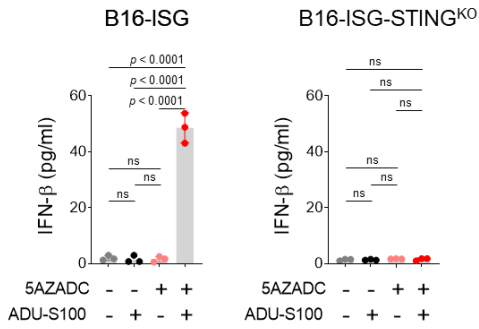

**c**

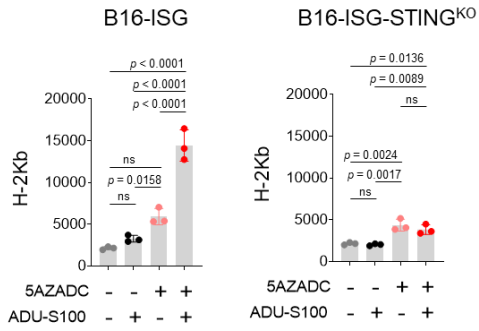

**d**

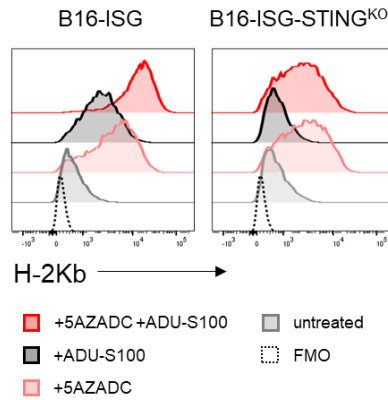

**Supplementary Figure 3. DNA demethylation-induced increased IFN- $\beta$  production and upregulation of MHC I in response to agonist stimulation in melanoma cells is STING mediated.**

Experimental setup for 5AZADC treatment of B16-ISG and B16-ISG-STING<sup>KO</sup> cell lines **(a)**. Following 5AZADC treatment, melanoma cells were stimulated with the STING agonist ADU-S100 for 24 h. Induction of IFN- $\beta$  in cell culture supernatants measured using ELISA **(b)**. Mean fluorescence intensity (MFI) **(c)** and representative histograms of MHC I (H2-Kb) expression **(d)** on indicated cell lines. Statistical significance was determined by one-way ANOVA (b and c) (ns, not significant). Data are shown as mean  $\pm$  SD of three biological replicates and are representative of two independent experiments.

# Supplementary Figure 4

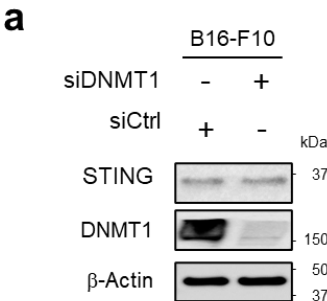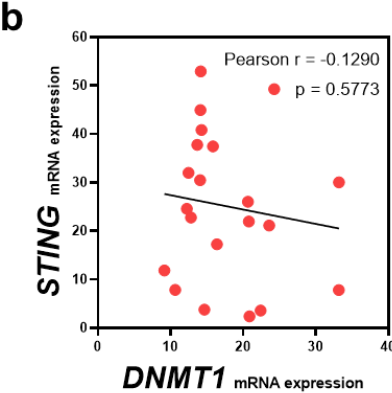



**Supplementary Figure 4. DNMT1 expression does not correlate with STING silencing in melanoma.**

Immunoblot analysis of STING and DNMT1 expression in B16-F10 cells transfected with siRNA specific for DNMT1 (siDNMT1) or nontarget siRNA (siControl).  $\beta$ -Actin was used as a loading control **(a)**. Images are representative of three independent experiments. Correlative analysis of *STING* mRNA expression with *DNMT1* in metastatic melanoma samples (n=21) from cBioPortal database **(b)**.

Supplementary Figure 5

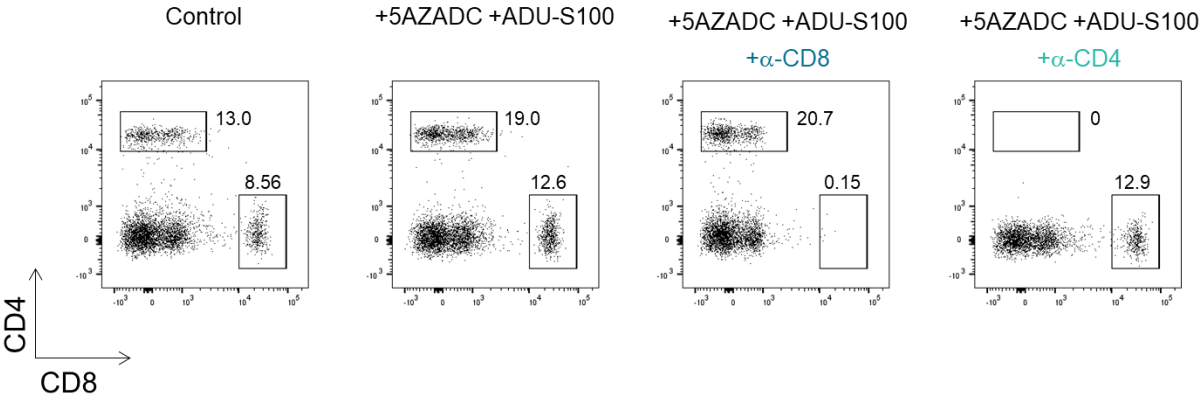

**Supplementary Figure 5. Verifying *in vivo* depletions.**

Confirmation of depletions for CD8<sup>+</sup> T cells and CD4<sup>+</sup> T cells in splenocytes. To deplete T cells, mice were injected intraperitoneally with 300 µg of anti-CD8 (clone 2.43, Bio X Cell), or anti-CD4 (clone GK1.5, Bio X Cell) 5 days prior to tumor implantation, and every 2-3 days thereafter for the duration of the study. Representative flow cytometry plots indicating expression of CD4 and CD8 in CD45<sup>+</sup> CD3<sup>+</sup> splenic T cells on day 21.

## Supplementary Figure 6

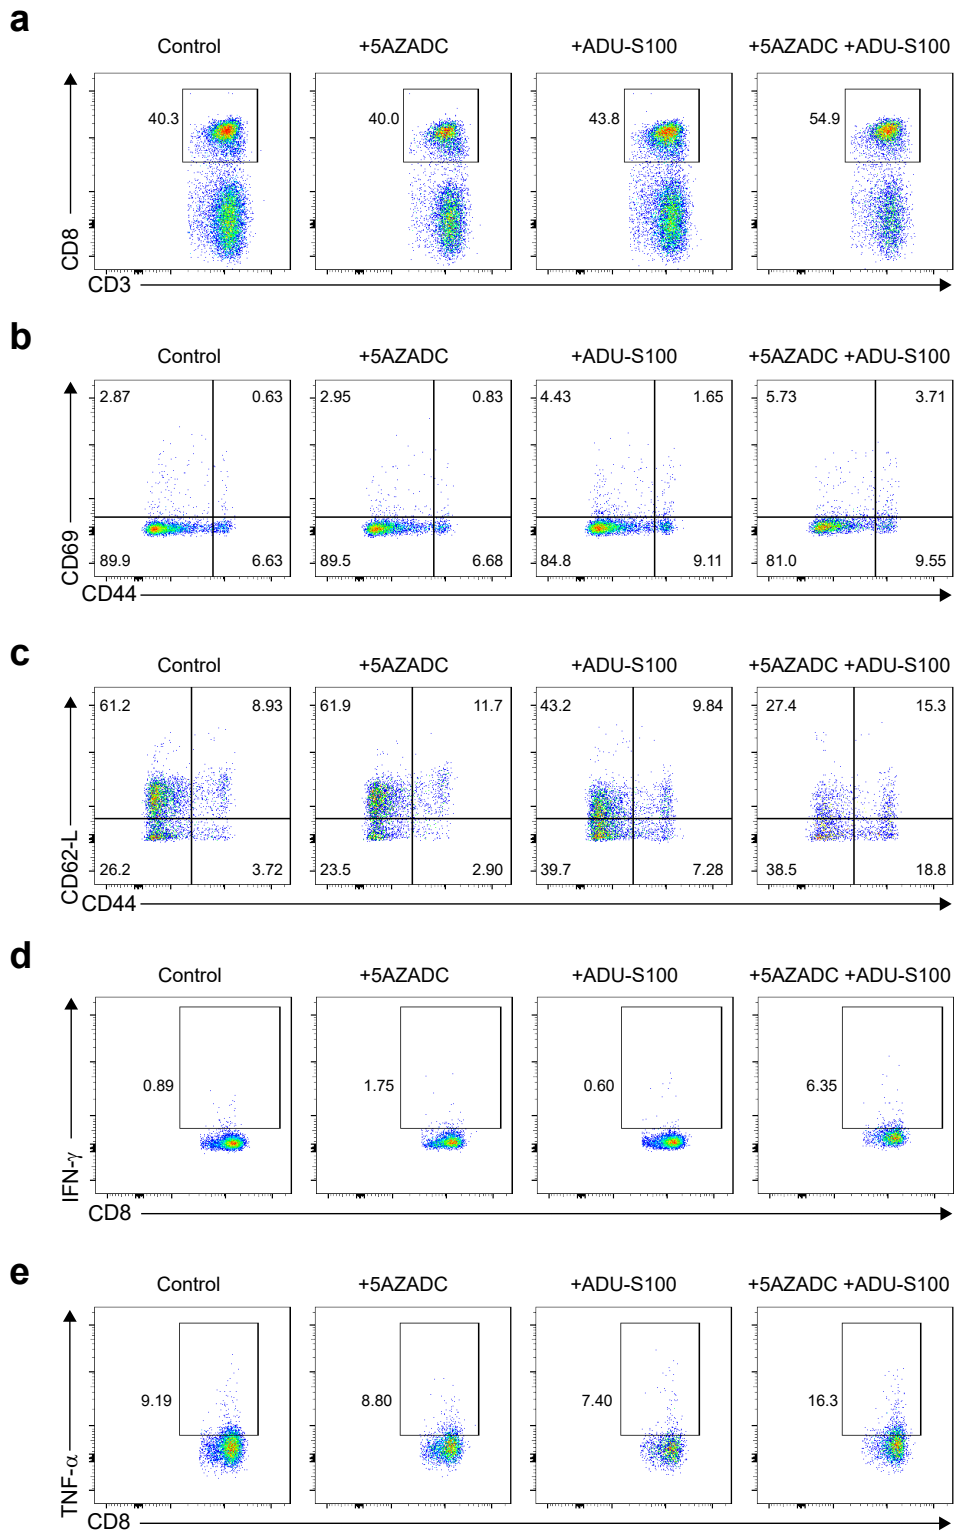

**Supplementary Figure 6. Representative flow cytometry plots for Figure 7.**

STING<sup>gt/gt</sup> mice with Yumm1.7 tumors were treated intratumorally with PBS, 5AZADC, ADU-S100, or 5AZADC+ADU-S100 as indicated in Figure 4a; spleens were harvested on 21 after tumor cell inoculation and analyzed by flow cytometry. Shown are representative flow cytometry plots indicating frequency of splenic CD8<sup>+</sup> cells within the CD3<sup>+</sup> population **(a)**, frequency of CD44<sup>+</sup> CD69<sup>+</sup> cells within the CD3<sup>+</sup> CD8<sup>+</sup> population **(b)**, frequency of Naïve (CD44<sup>-</sup> CD62L<sup>+</sup>), Effector (CD44<sup>-</sup> CD62L<sup>-</sup>), Effector Memory (CD44<sup>+</sup> CD62L<sup>-</sup>), and central memory (T<sub>CM</sub>, CD44<sup>+</sup> CD62L<sup>+</sup>) CD8<sup>+</sup> T cells **(c)**, and frequency of IFN- $\gamma$ <sup>+</sup> **(d)** and TNF- $\alpha$ <sup>+</sup> **(e)** CD8<sup>+</sup> T cells.

# Supplementary Figure 7

**a**

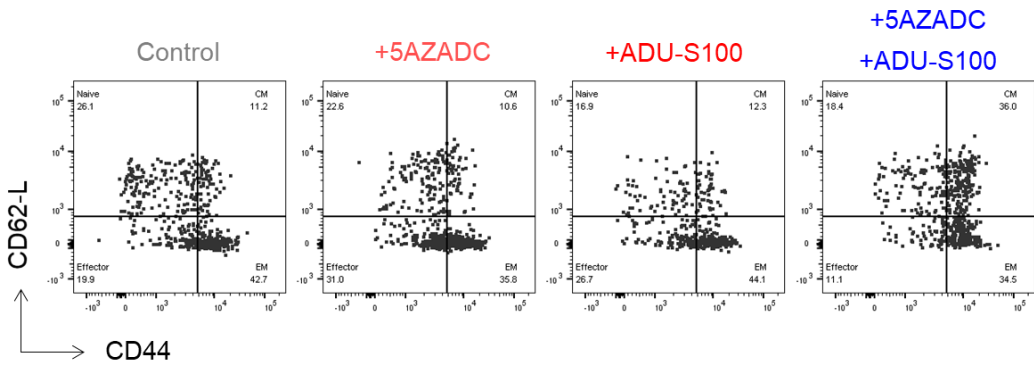

**b**

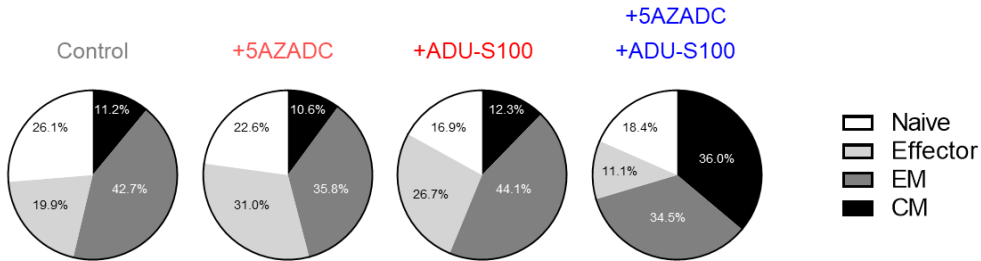

**Supplementary Figure 7. CD8<sup>+</sup> TILs in combination therapy-treated mice indicate memory phenotype.**

STING<sup>gt/gt</sup> mice with Yumm1.7 tumors were treated intratumorally with PBS, 5AZADC, ADU-S100, or 5AZADC+ADU-S100 as indicated in Figure 4a. Shown are representative flow cytometry plots **(a)** and pie charts **(b)** indicating relative proportions of Naïve (CD44<sup>-</sup> CD62L<sup>+</sup>), Effector (CD44<sup>-</sup> CD62L<sup>-</sup>), Effector Memory (EM; CD44<sup>+</sup> CD62L<sup>-</sup>) and Central Memory (CM; CD44<sup>+</sup> CD62L<sup>+</sup>) T cell subsets within the CD3<sup>+</sup> CD8<sup>+</sup> population in Yumm1.7 tumors on day 21.

# Supplementary Figure 8

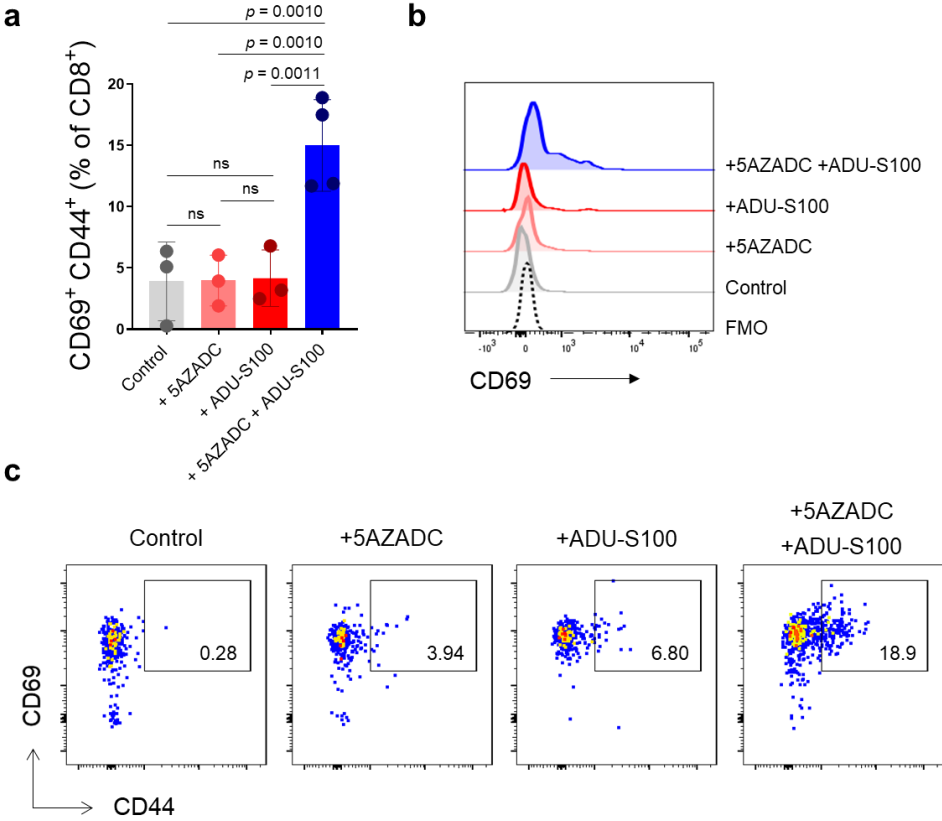



**Supplementary Figure 8. CD8<sup>+</sup> TILs in combination therapy-treated mice indicate higher expression of antigen-experience and activation markers.**

STING<sup>gt/gt</sup> mice with B16-ISG tumors were treated intratumorally with PBS, 5AZADC, ADU-S100, or 5AZADC+ADU-S100 as indicated in Figure 4a. Frequency of CD44<sup>+</sup> CD69<sup>+</sup> cells **(a)** and representative histograms of CD69 **(b)** within the CD3<sup>+</sup> CD8<sup>+</sup> population in B16-ISG tumors on day 21. n = 3, 3, 3, 4 mice in (b) for Control, 5AZADC, ADU-S100, and 5AZADC+ADU-S100 groups, respectively. Data are shown as mean ± SD. Statistical significance was determined by one-way ANOVA (ns, not significant). Representative flow cytometry plots for (a) are shown in **(c)**.

# Supplementary Figure 9

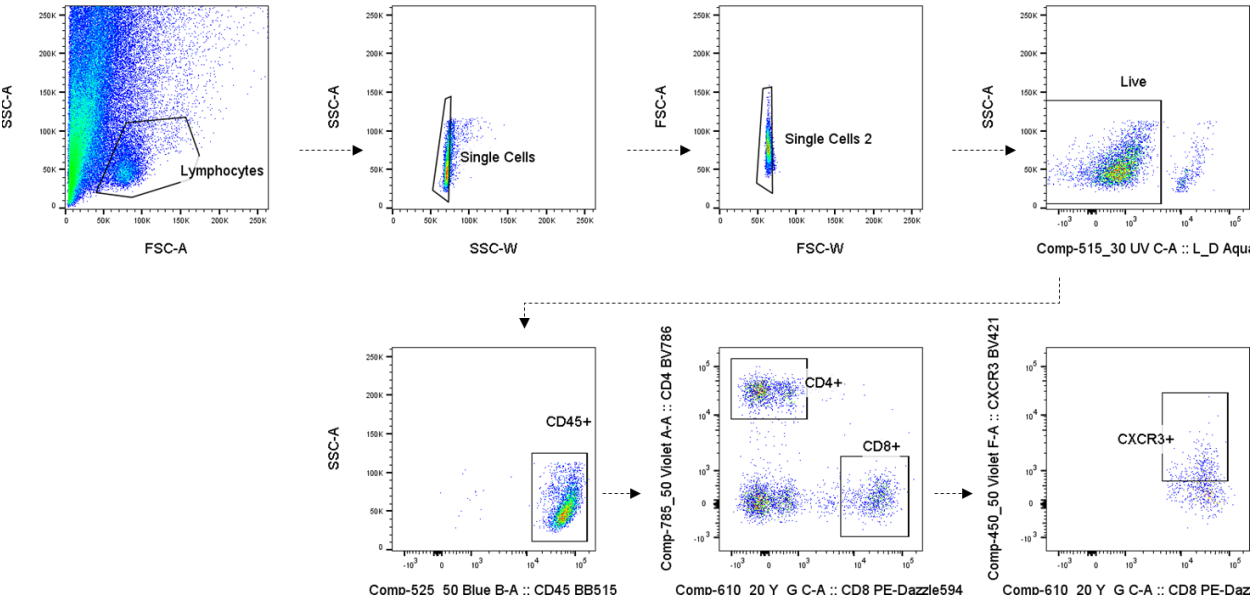

**Supplementary Figure 9. Example of flow cytometry gating strategy.**

Representative gating strategy to analyze CD8<sup>+</sup> T cells in tumors and spleens (relevant to Fig. 1d-g, Fig. 5b, Supplementary Fig. 1c-d, and Supplementary Fig. 5).

# Supplementary Figure 10

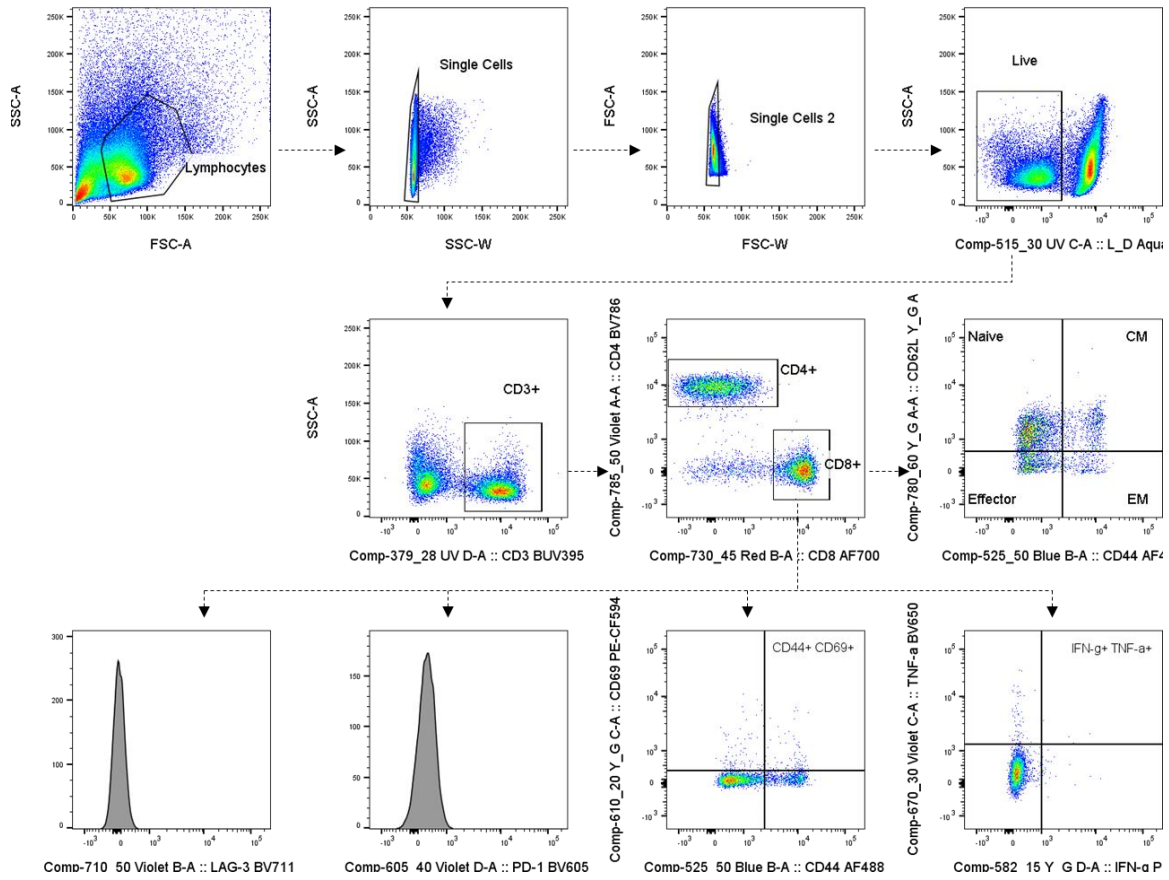

**Supplementary Figure 10. Example of flow cytometry gating strategy.**

Representative gating strategy to determine frequency, differentiation [Naïve: CD44<sup>-</sup> CD62L<sup>+</sup>; Effector: CD44<sup>-</sup> CD62L<sup>-</sup>; Effector Memory (EM): CD44<sup>+</sup> CD62L<sup>-</sup>; Central Memory (CM): CD44<sup>+</sup> CD62L<sup>+</sup>], activation (CD44<sup>+</sup> CD69<sup>+</sup>) and IFN- $\gamma$  and TNF- $\alpha$  expression of CD8<sup>+</sup> T cells in spleens and tumors (relevant to Fig. 6a-h, Fig. 7a-g, Fig. 8d-f, Supplementary Fig. 6a-e, Supplementary Fig. 7a-b, and Supplementary Fig. 8a-c)
